# Supplementary material for: Building a eukaryotic chromosome arm by de novo design and synthesis
Source: PubMed Central journal article supplement (PMC10689750; doi:10.1038/s41467-023-43531-5), 2023-11-30
Supplement: 41467_2023_43531_MOESM2_ESM.pdf [file 41467_2023_43531_MOESM2_ESM.pdf]

**Title: Supplementary Data 1.**

**Legends:** The designed sequences of neo-chromosomes and the identified variations of assembled neo-chromosomes.

**Title: Supplementary Data 2.**

**Legends:** Differentially expressed genes (DEG) in corresponding strains, including ptWT10-10KO, ptWT10U-10KO, yWT12, yWT25 and ySYN24. DESeq2 was used to calculate Benjamini-Hochberg adjusted p-values and fold change (FC) values. Differential expression in this study was defined as  $|\log_2FC| > 1$  and  $-\log_{10}(\text{Adjusted p-value}) > 4$ . BY4742 was used as the control strain.

**Title: Supplementary Data 3.**

**Legends:** Sequences of reconstructed TUs, synthetic promoters and synthetic terminators.

**Title: Supplementary Data 4.**

**Legends:** Strains used in this study.

**Title: Supplementary Data 5.**

**Legends:** Oligonucleotides used in this study.
